# Supplementary material
Source: Springer Nature journal article supplement (https://www.springermedizin.de/resource/supplementary/12961_2012_271_MOESM2_ESM.pdf/9570928)

**a**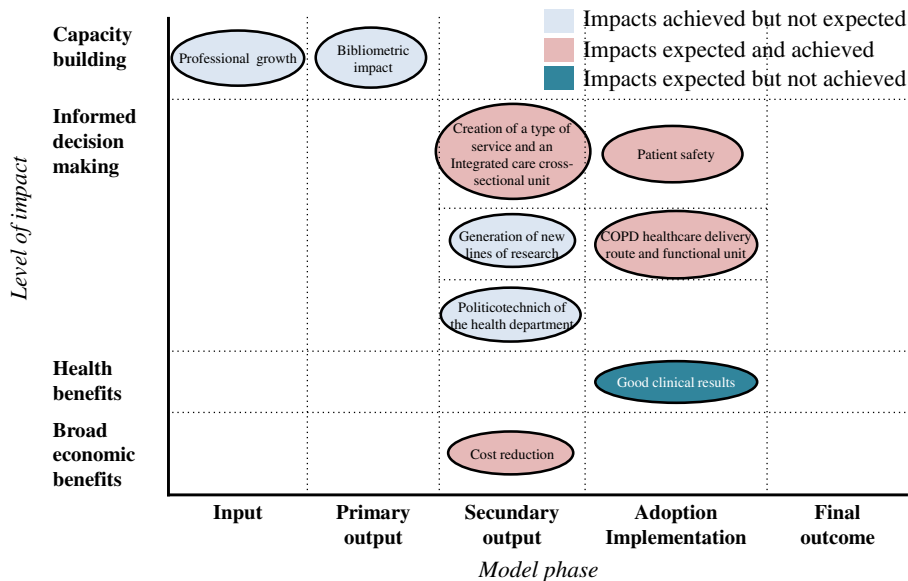**b**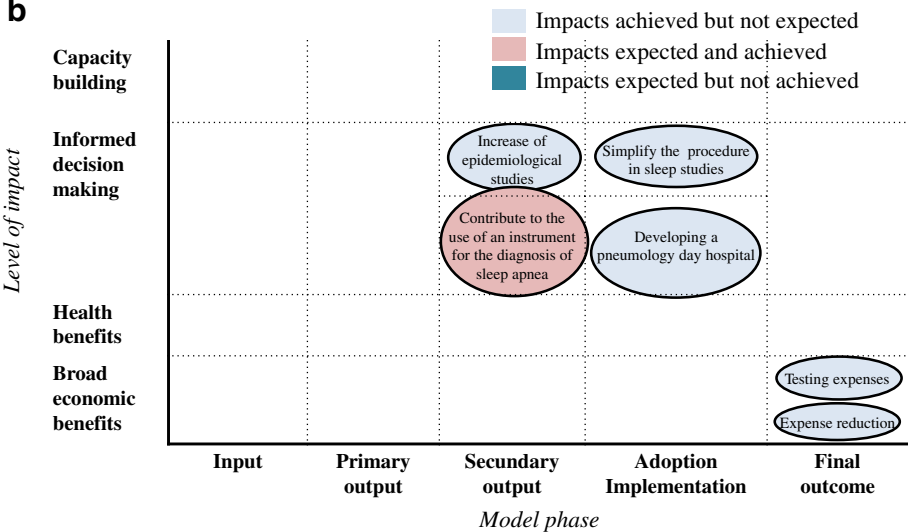

Supplement: MOESM2 [file 9570928]
